# Supplementary material for: Stability and structure of mono- and dinuclear Cu(ii), Ni(ii) and Zn(ii) complexes of pyrazole and triazole bridged bis-macrocyclesElectronic supplementary information (ESI) available: titration curves and species distribution curves. See http://www.rsc.org/suppdata/dt/b2/b212113a/
Source: Royal Society of Chemistry journal article supplement (doi:10.1039/b212113a), 2003-02-28
Supplement: b212113a.doc [file b212113a.doc]

**Fig. S1** Titration curves of **L2** in the presence of 0.85 (■) and 1.85 (●) equivalents of Zn2+, ― fitting with the model given in Table 3.

**Fig. S2** Species distribution of the complexes of **L2** with 0.85 equivalents of Zn2+

**Fig. S3** Species distribution of the complexes of **L2** with 1.85 equivalents of Zn2+.

**Fig. S4** Titration curves of **L2** in the presence of 0.85 (■) and 1.85 (●) equivalents of Ni2+, ― fitting with the model given in Table 3. (σml = 3.8·10-3 ml , [L] = 1.36 · 10-3 M).

**Fig. S5**  Species distribution of the complexes of **L2** with 0.85 equivalents of Ni2+

([L] = 1.36 · 10-3 M).

**Fig. S6**  Species distribution of the complexes of **L2** with 1.85 equivalents of Ni2+

([L] = 1.36 · 10-3 M).

**Fig. S7**  Titration curves of **L1** in the presence of 0.85 (■) and 1.85 (●) equivalents of Cu2+, ― fitting with the model given in Table 3. (σml = 1.5 · 10-3 ml, [L] = 1.36 · 10-3 M).

Fig. S8 Species distribution of the complexes of L1 with 0.85 equivalents of Cu2+.([L] = 1.36 · 10-3 M).

Fig. S9 Species distribution of the complexes of L1 with 1.85 equivalents of Cu2+; ([Ligand] = 1.36 · 10-3 M).

**Fig. S10** Titration curve of **L1** ― fitting with the model given in Table 2 (σml = 6.75 · 10-4 ml, [L] = 1.36 · 10-3 M).

Fig. S11 Species distribution of L1 ([L] = 1.36 · 10-3 M).
